# Supplementary material
Source: MDPI journal article supplement (https://www.mdpi.com/2073-4344/14/3/196)
Supplement: s1 [file s1]

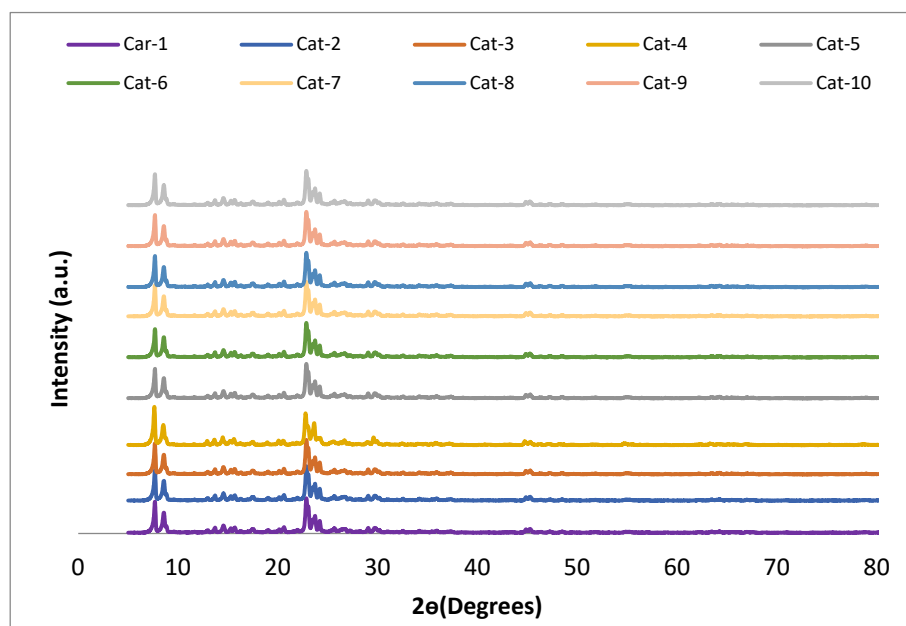

Figure S1. XRD patterns of catalyst samples

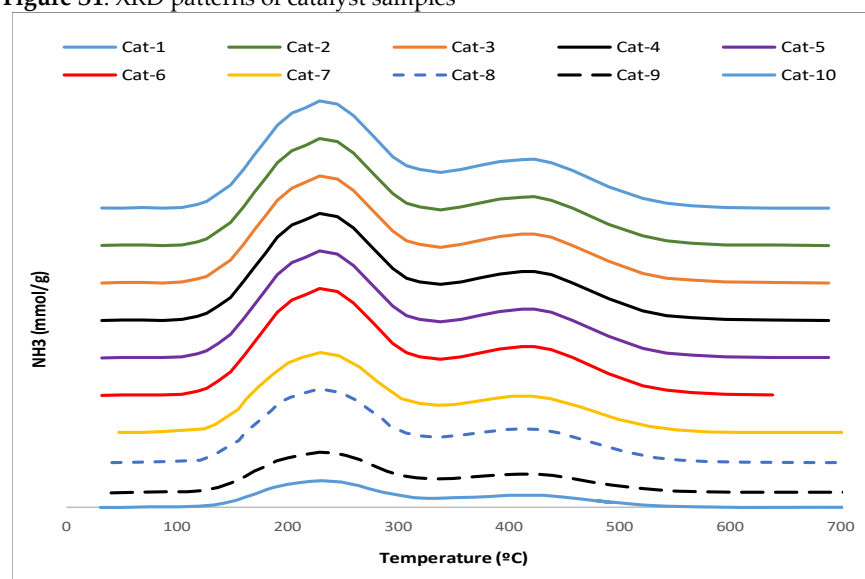

Figure S2.  $\text{NH}_3$ -TPD profiles of catalyst samples

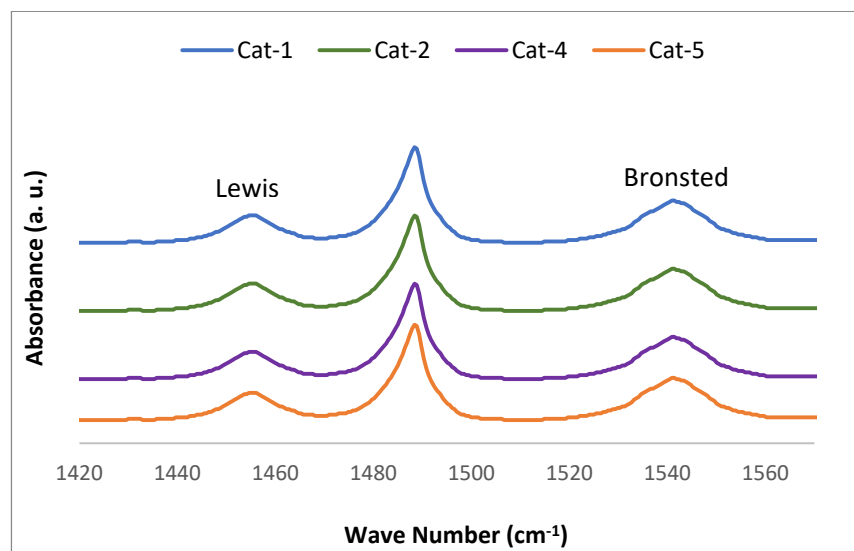

Figure S3. FTIR spectra of chemisorbed pyridine of selected catalyst samples.
